# Supplementary material for: A Genetic History of the Balkans from Roman Frontier to Slavic Migrations
Source: PubMed Central journal article supplement (PMC10752003; doi:10.1016/j.cell.2023.10.018), 2023-12-07
Supplement: NIHMS1944038-supplement-Figure_S1.pdf [file NIHMS1944038-supplement-Figure_S1.pdf]

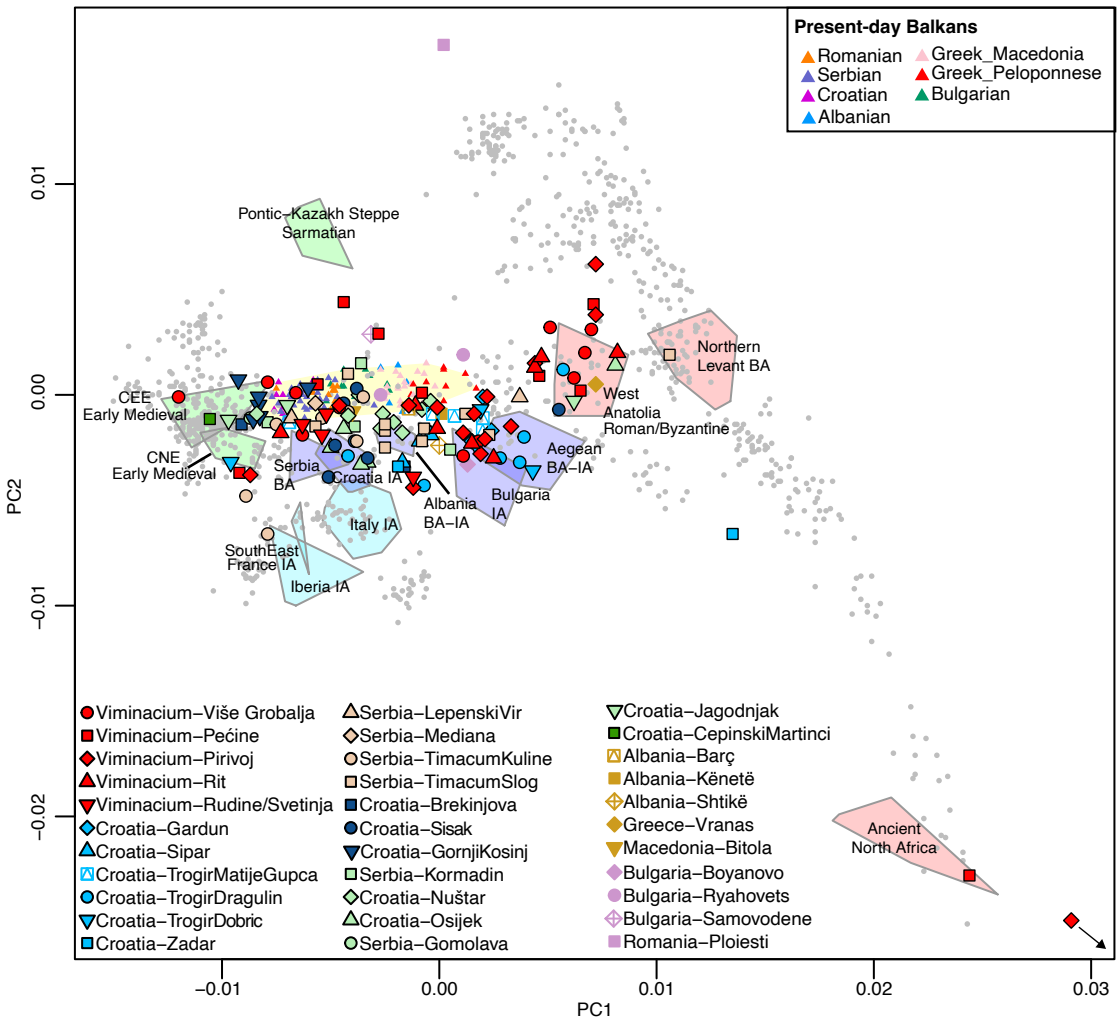

**Present-day Balkans**

- ▲ Romanian
- ▲ Serbian
- ▲ Croatian
- ▲ Albanian
- ▲ Greek\_Macedonia
- ▲ Greek\_Peloponnese
- ▲ Bulgarian

|                              |                        |                            |
|------------------------------|------------------------|----------------------------|
| ● Viminacium–Više Grobalja   | △ Serbia–LepenskiVir   | ▽ Croatia–Jagodnjak        |
| ■ Viminacium–Pećine          | ◇ Serbia–Mediana       | ■ Croatia–CepinskiMartinci |
| ◆ Viminacium–Pirivoj         | ○ Serbia–TimacumKuline | ▨ Albania–Barç             |
| ▲ Viminacium–Rit             | □ Serbia–TimacumSlog   | ■ Albania–Kënetë           |
| ▼ Viminacium–Rudine/Svetinja | ■ Croatia–Brekinjova   | ◆ Albania–Shtikë           |
| ◇ Croatia–Gardun             | ● Croatia–Sisak        | ◆ Greece–Vranas            |
| ▲ Croatia–Sipar              | ▼ Croatia–GornjiKosinj | ▲ Macedonia–Bitola         |
| ▨ Croatia–TrogirMatijeGupca  | □ Serbia–Kormadin      | ● Bulgaria–Boyanovo        |
| ● Croatia–TrogirDragulin     | ◇ Croatia–Nuštar       | ● Bulgaria–Ryahovets       |
| ▼ Croatia–TrogirDobric       | △ Croatia–Osijek       | ◇ Bulgaria–Samovodene      |
| ■ Croatia–Zadar              | ○ Serbia–Gomolava      | ■ Romania–Ploiesti         |
