# Supplementary material for: A Genetic History of the Balkans from Roman Frontier to Slavic Migrations
Source: PubMed Central journal article supplement (PMC10752003; doi:10.1016/j.cell.2023.10.018), 2023-12-07

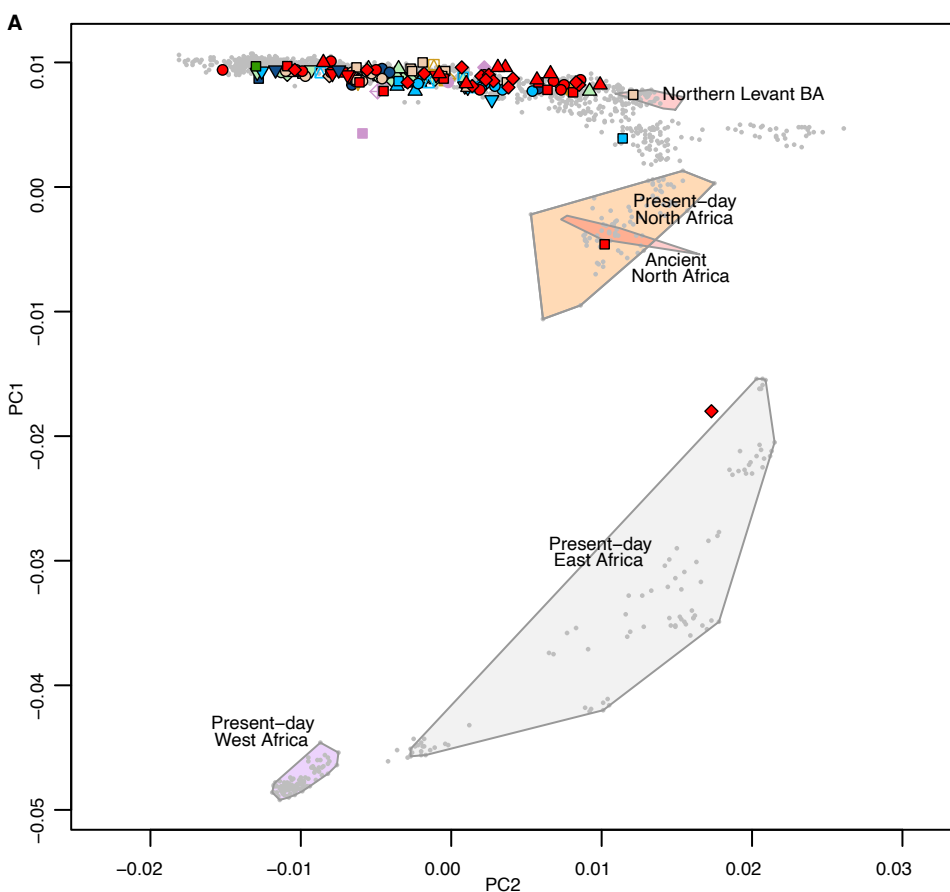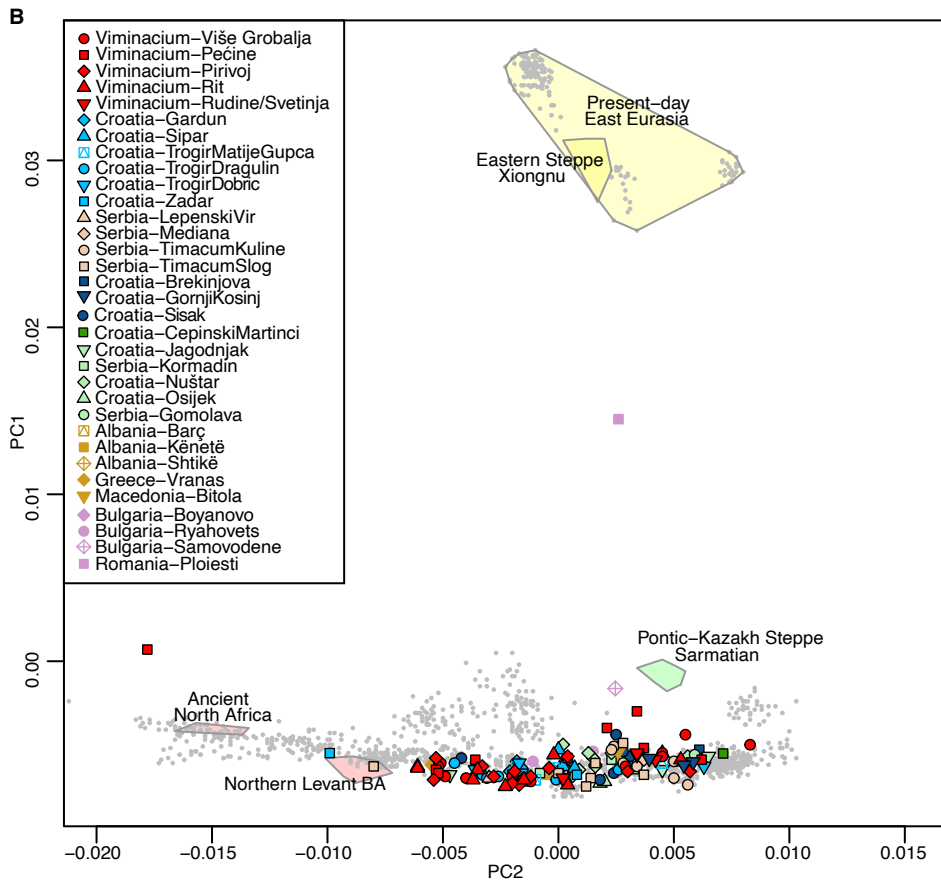

Supplement: NIHMS1944038-supplement-Figure_S2.pdf [file NIHMS1944038-supplement-Figure_S2.pdf]
